# Supplementary figures and images for: Integrated 3D Deep Learning Approach: YOLO-Decoupled Candidate Detection and 3D CNN-Driven False Positive Reduction for Lung Nodule Analysis in CT
Source: Research Square preprint supplement (doi:10.21203/rs.3.rs-8204090/v1), 2025-12-08

Batch Norm

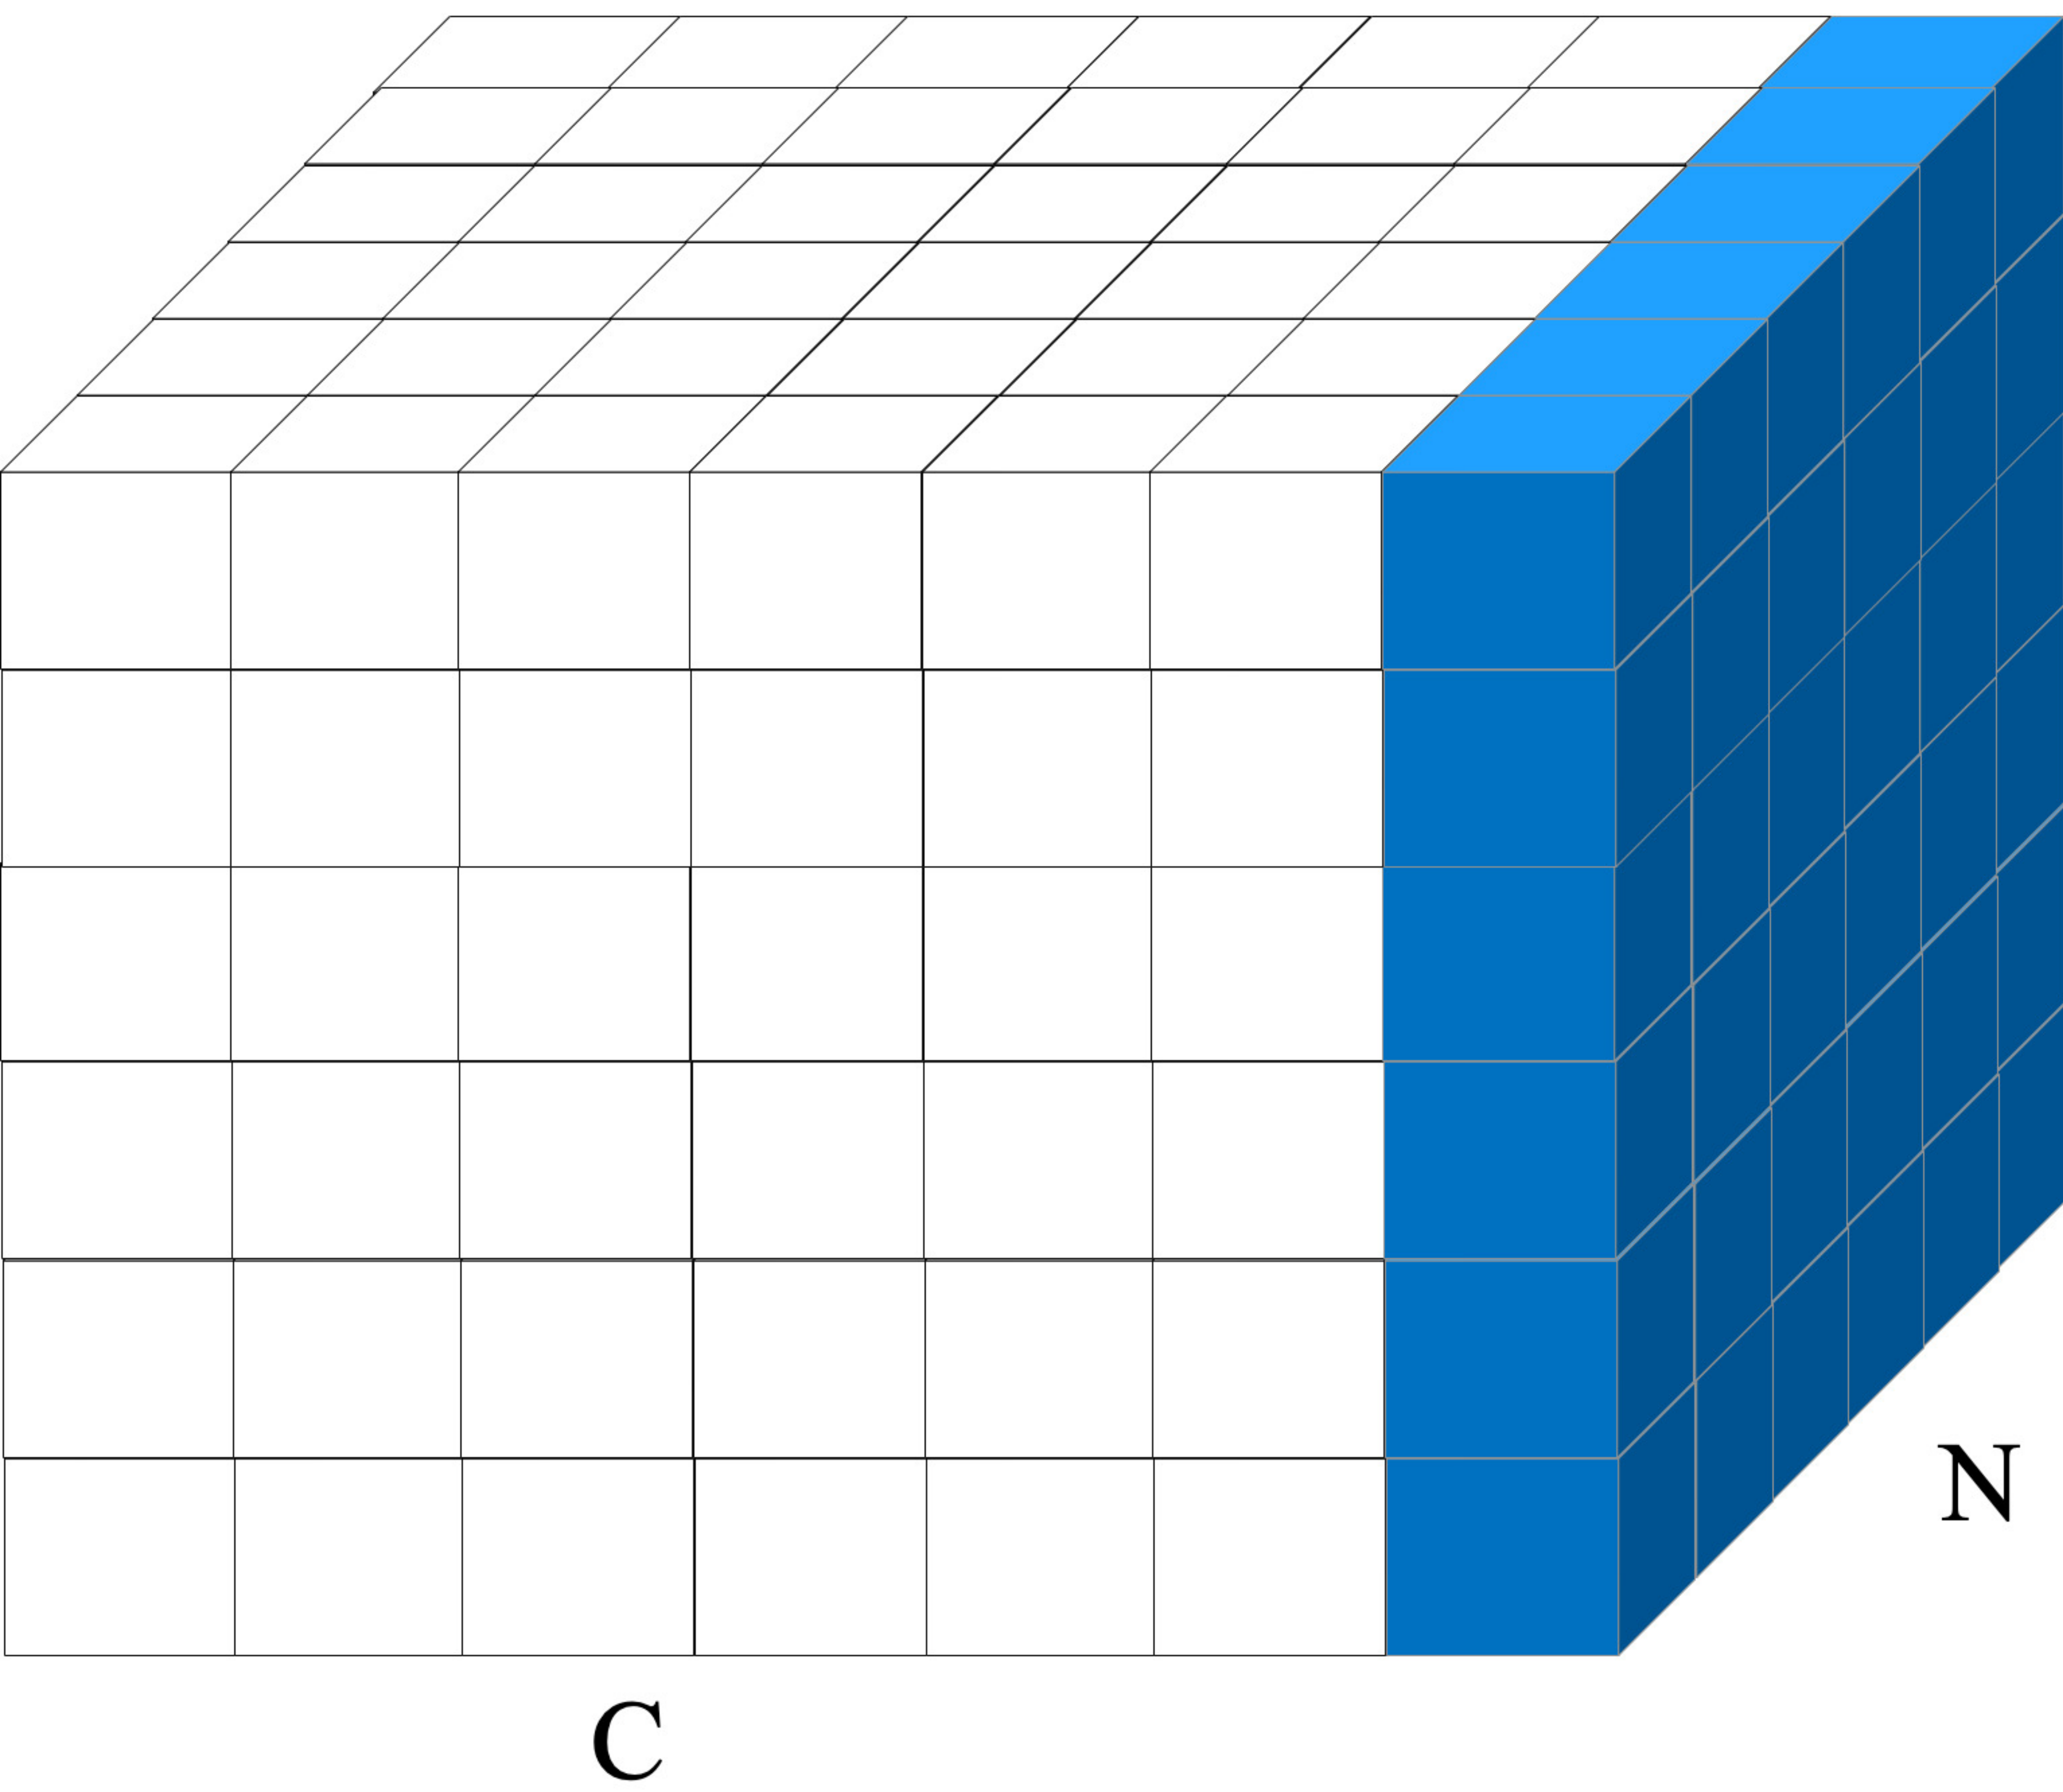

Group Norm

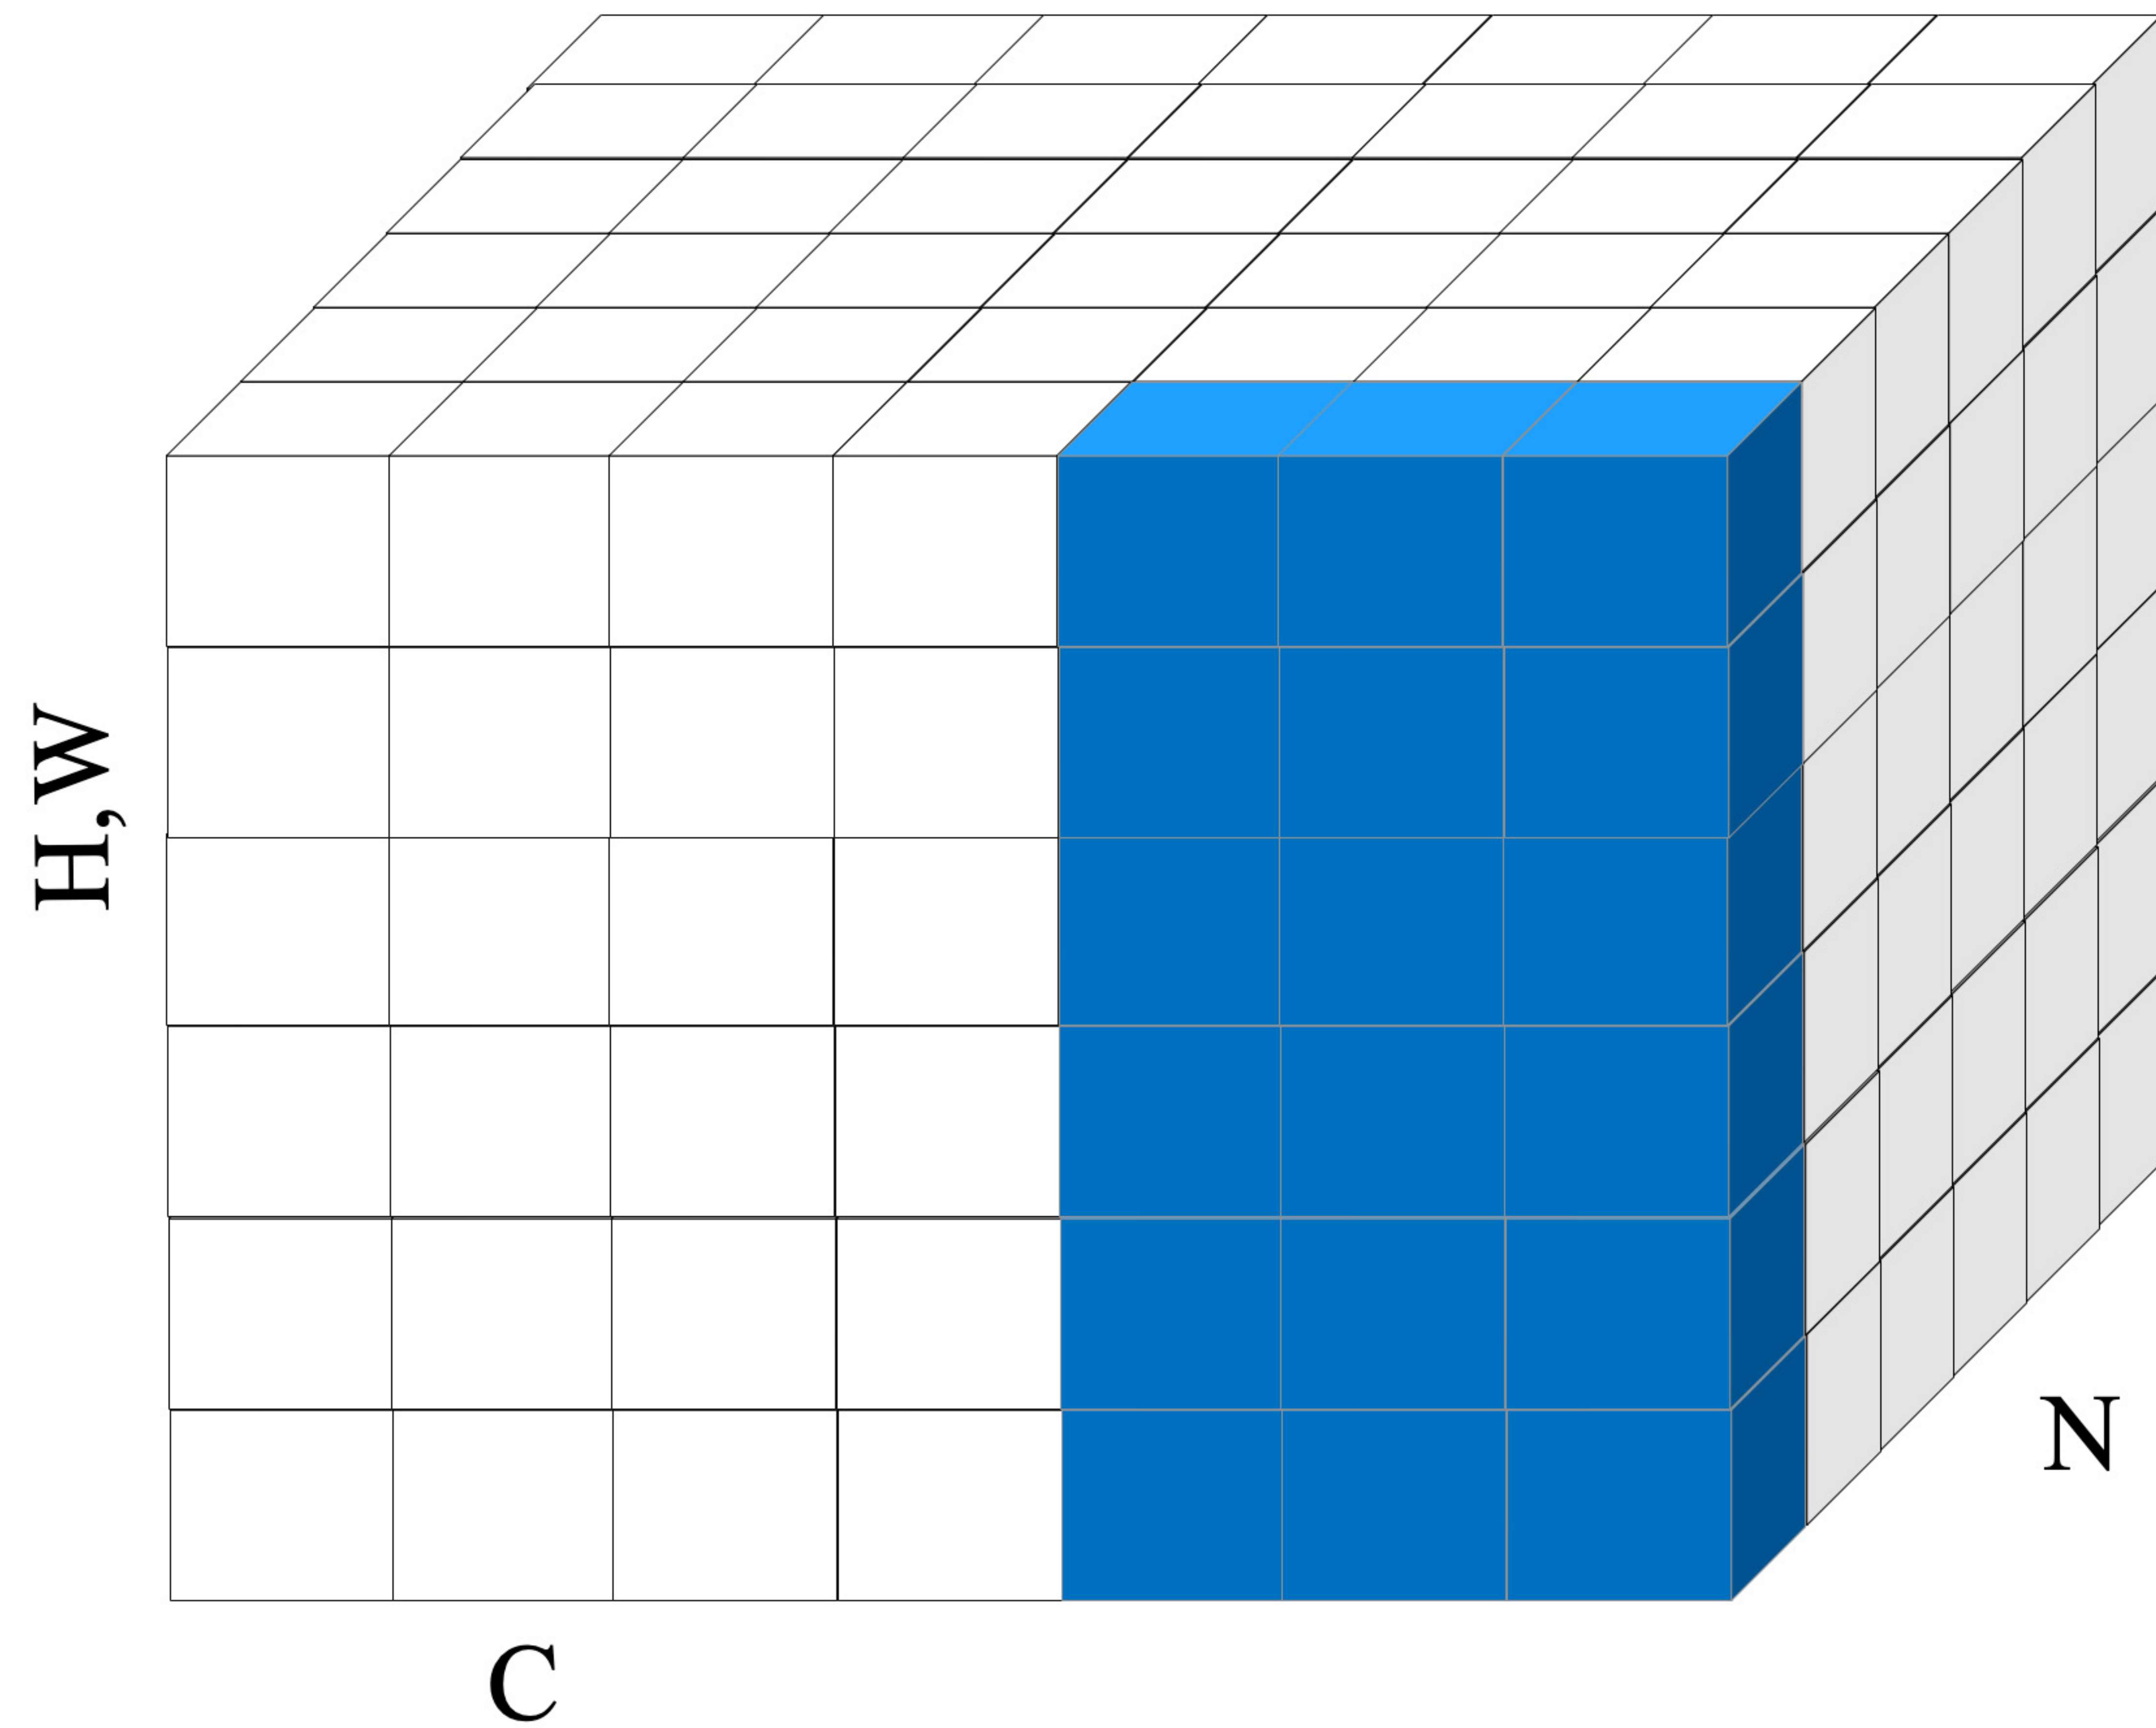

Supplement: Supplementary file 1 [file Fig-S1-eps-converted-to.pdf › supplement/Fig-S1-eps-converted-to.pdf]

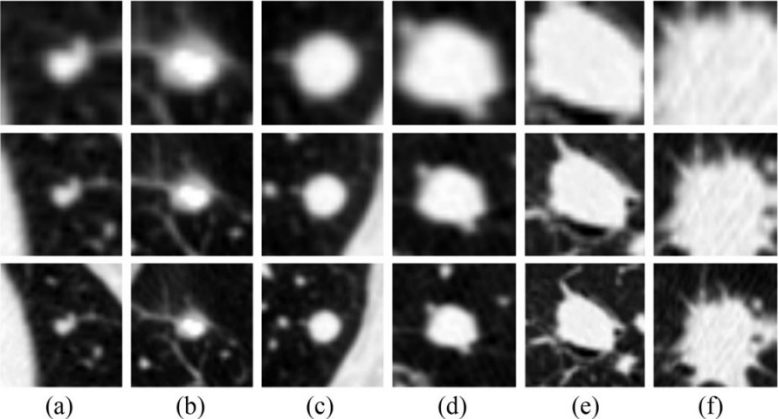

Supplement: Supplementary file 2 [file Fig-S2-eps-converted-to.pdf › supplement/Fig-S2-eps-converted-to.pdf]
